# Supplementary material for: Identification of Novel Clinical Factors Associated with Hepatic Fat Accumulation in Extreme Obesity
Source: Hindawi journal article supplement (doi:10.1155/2014/368210), 2014-01-01
Supplement: f1 [file 368210.f1.pdf]

## Supplementary Information

### **Identification of novel clinical factors associated with hepatic fat accumulation in extreme obesity.**

Gerhard, et al.

The Supplemental materials have the following sections in order:

1. Table S1. Clinical variables used in regression analysis (n=204 variables).
2. Table S2. Summary of 22 available published reports on 4274 patients with extreme obesity undergoing bariatric surgery and liver biopsy.
3. References for Table S2.

**Table 1:** Clinical variables used in regression analysis (n=204 variables).

|                                                                                                                                                                                                                                                                                                                                                                                                                                                                                                                                                                                                                                                                                                                                                                                                                                                                                                                                                                                                                                                                                                                                                                                                                                                                                                                                               |                                                                                                                                                                                                                                                                                                                                                                                                                                                                                                                                                                                                                                                                                                                                                                                                                                                                                                                                                                                                                                                                                                                                                                                                                                                                             |                                                                                                                                                                                                                                                                                                                                                                                                                                                                                                                                                                                                                                                                                                                                                                                                                                                                                                                                                                                                                                                                                                                                                                                                                                                                                                                                                                                                                                                                                                                                                                                                                                                             |                                                                                                                                                                                                                                                                                                                                                                                                                                                                                                                                                                                                                                                                                                                                                                                                                                                                                                                                                                                                                                                                                                                                                                                                                           |
|-----------------------------------------------------------------------------------------------------------------------------------------------------------------------------------------------------------------------------------------------------------------------------------------------------------------------------------------------------------------------------------------------------------------------------------------------------------------------------------------------------------------------------------------------------------------------------------------------------------------------------------------------------------------------------------------------------------------------------------------------------------------------------------------------------------------------------------------------------------------------------------------------------------------------------------------------------------------------------------------------------------------------------------------------------------------------------------------------------------------------------------------------------------------------------------------------------------------------------------------------------------------------------------------------------------------------------------------------|-----------------------------------------------------------------------------------------------------------------------------------------------------------------------------------------------------------------------------------------------------------------------------------------------------------------------------------------------------------------------------------------------------------------------------------------------------------------------------------------------------------------------------------------------------------------------------------------------------------------------------------------------------------------------------------------------------------------------------------------------------------------------------------------------------------------------------------------------------------------------------------------------------------------------------------------------------------------------------------------------------------------------------------------------------------------------------------------------------------------------------------------------------------------------------------------------------------------------------------------------------------------------------|-------------------------------------------------------------------------------------------------------------------------------------------------------------------------------------------------------------------------------------------------------------------------------------------------------------------------------------------------------------------------------------------------------------------------------------------------------------------------------------------------------------------------------------------------------------------------------------------------------------------------------------------------------------------------------------------------------------------------------------------------------------------------------------------------------------------------------------------------------------------------------------------------------------------------------------------------------------------------------------------------------------------------------------------------------------------------------------------------------------------------------------------------------------------------------------------------------------------------------------------------------------------------------------------------------------------------------------------------------------------------------------------------------------------------------------------------------------------------------------------------------------------------------------------------------------------------------------------------------------------------------------------------------------|---------------------------------------------------------------------------------------------------------------------------------------------------------------------------------------------------------------------------------------------------------------------------------------------------------------------------------------------------------------------------------------------------------------------------------------------------------------------------------------------------------------------------------------------------------------------------------------------------------------------------------------------------------------------------------------------------------------------------------------------------------------------------------------------------------------------------------------------------------------------------------------------------------------------------------------------------------------------------------------------------------------------------------------------------------------------------------------------------------------------------------------------------------------------------------------------------------------------------|
| <p><b>Baseline information and demographics</b></p> <ul style="list-style-type: none"> <li>• Gender</li> <li>• Ethnic group</li> <li>• Age</li> <li>• Height</li> <li>• Weight at baseline</li> <li>• BMI at baseline</li> <li>• Waist circumference</li> <li>• Waist-height ratio</li> <li>• REE</li> <li>• VO2max</li> <li>• Alcohol use</li> <li>• Smoking history</li> <li>• Weight loss during pre-op program</li> <li>• Time in pre-op program</li> <li>• Surgical approach (open versus lap)</li> <li>• Number of comorbidities during pre-op period</li> <li>• Number of medications during pre-op period</li> </ul> <p><b>Comorbidities on problem list from baseline to surgery using 3-digit ICD9, requiring 2% of population</b></p> <ul style="list-style-type: none"> <li>• ICD_401</li> <li>• ICD_272</li> <li>• ICD_250</li> <li>• ICD_780</li> <li>• ICD_530</li> <li>• ICD_311</li> <li>• ICD_715</li> <li>• ICD_244</li> <li>• ICD_493</li> <li>• ICD_724</li> <li>• ICD_722</li> <li>• ICD_300</li> <li>• ICD_477</li> <li>• ICD_346</li> <li>• ICD_251</li> <li>• ICD_305</li> <li>• ICD_327</li> <li>• ICD_296</li> <li>• ICD_786</li> <li>• ICD_729</li> <li>• ICD_782</li> <li>• ICD_309</li> <li>• ICD_790</li> <li>• ICD_719</li> <li>• ICD_564</li> <li>• ICD_256</li> <li>• ICD_414</li> <li>• ICD_553</li> </ul> | <ul style="list-style-type: none"> <li>• ICD_354</li> <li>• ICD_789</li> <li>• ICD_726</li> <li>• ICD_784</li> <li>• ICD_269</li> <li>• ICD_592</li> <li>• ICD_427</li> <li>• ICD_626</li> <li>• ICD_787</li> <li>• ICD_268</li> <li>• ICD_627</li> <li>• ICD_429</li> <li>• ICD_625</li> <li>• ICD_276</li> <li>• ICD_794</li> <li>• ICD_274</li> <li>• ICD_728</li> <li>• ICD_357</li> <li>• ICD_785</li> <li>• ICD_307</li> <li>• ICD_796</li> <li>• ICD_428</li> </ul> <p><b>Medications on reconciliation list from baseline to 1 month prior to surgery using subclass, requiring 2% of population</b></p> <ul style="list-style-type: none"> <li>• Biguanides</li> <li>• NSAID</li> <li>• PPI</li> <li>• SSRI</li> <li>• Statins</li> <li>• OpioidAgonist</li> <li>• OpioidCombo</li> <li>• OilSolVit</li> <li>• ACE</li> <li>• Salicylates</li> <li>• Sympath</li> <li>• BBCS</li> <li>• H2</li> <li>• LoopDiur</li> <li>• ThyroidHorm</li> <li>• AnalgOther</li> <li>• MultiVit</li> <li>• Insulin</li> <li>• AntihistNonsed</li> <li>• Calcium</li> <li>• Thiazides</li> <li>• Benzod</li> <li>• MuscleRelax</li> <li>• AntiHTNcomb</li> <li>• NasalSteroids</li> <li>• AnticonvMisc</li> <li>• SNRI</li> <li>• Sulfonylureas</li> <li>• InsSensAgents</li> </ul> | <ul style="list-style-type: none"> <li>• CCB</li> <li>• Potassium</li> <li>• Glucocort</li> <li>• ARB</li> <li>• Cough_Cold_AllComb</li> <li>• AnorexNonAmph</li> <li>• AntidepressMisc</li> <li>• MultiVitMinerals</li> <li>• CorticTopical</li> <li>• WaterSolubleVitamins</li> <li>• Heparin</li> <li>• Azithromycin</li> <li>• Aminopenicillins</li> <li>• NonBarbitHypnotics</li> <li>• SteroidInhalants</li> <li>• LeukotrieneModulators</li> <li>• Tricyclic</li> <li>• AntifungalsTopical</li> <li>• Iron</li> <li>• SmokingDeterrents</li> <li>• ComboContraceptOral</li> <li>• FibricAcid</li> <li>• Fluoroquinolones</li> <li>• Nitrates</li> <li>• SerotoninAgonists</li> <li>• AntiInfectiveMiscCombo</li> <li>• Cephalosporins1stGen</li> <li>• UrinaryAntispasmodics</li> <li>• ModifiedCyclics</li> <li>• PenicillinCombo</li> <li>• DiureticCombo</li> <li>• Tetracyclines</li> <li>• AntiemetAnticholinergic</li> <li>• AnticonvulsantsBenzod</li> <li>• PlateAggrInhibitors</li> <li>• Coumarin</li> <li>• AntihyperlipidCombo</li> <li>• PotSparingDiuretics</li> <li>• AntiObesityAgents</li> <li>• SurfactantLaxatives</li> <li>• AntianxietyAgentsMisc</li> <li>• ImidazoleRelAntifungal</li> <li>• GoutAgents</li> <li>• AntiparkinDopaminergic</li> <li>• Cobalamins</li> <li>• Dibenzapines</li> <li>• Progestins</li> <li>• IntesCholAbsorptionInhib</li> <li>• Antitussives</li> <li>• AntihistPhenothiazines</li> <li>• Clarithromycin</li> <li>• UlcerTherapyCombo</li> <li>• Estrogens</li> <li>• ProgestContraInjectable</li> <li>• FolicAcidFolates</li> <li>• BronchoAnticholinergics</li> <li>• BulkLaxatives</li> </ul> | <ul style="list-style-type: none"> <li>• AntiInfectiveAgentsMisc</li> <li>• AntiadrenergicAntiHTN</li> <li>• BBNS</li> <li>• GastrointestlStimulants</li> <li>• AnalgesicCombo</li> <li>• IncretinMimetAgGLP1</li> </ul> <p><b>Labs prior to surgery found in &gt;50% of population</b></p> <ul style="list-style-type: none"> <li>• glucose</li> <li>• insulin</li> <li>• hba1c</li> <li>• bun</li> <li>• sodium</li> <li>• potassium</li> <li>• CHLORIDE</li> <li>• CO2</li> <li>• creat</li> <li>• calcium</li> <li>• GFR</li> <li>• WBC</li> <li>• RBC</li> <li>• HEMOGLOBIN</li> <li>• HCT</li> <li>• MCV</li> <li>• MCH</li> <li>• MCHC</li> <li>• RDW</li> <li>• PLATELET</li> <li>• TSH</li> <li>• TRIG</li> <li>• CHOL</li> <li>• HDL</li> <li>• LDL</li> <li>• CholHDLRat</li> <li>• ALT</li> <li>• AST</li> <li>• AlkPhos</li> <li>• TotBili</li> <li>• MPV</li> <li>• AnionGap</li> <li>• Ferritin</li> <li>• Iron</li> <li>• IBC</li> <li>• TransSat</li> <li>• PTH</li> <li>• FolicAcid</li> <li>• Vitamin D 25 OH D2</li> <li>• Vitamin D 25 OH D3</li> <li>• Vitamin D 25 TOTAL</li> <li>• Creatinine, RD Urine</li> <li>• Protein, RD Urine</li> <li>• Prot/Creat Ratio</li> <li>• Zinc level</li> </ul> |
|-----------------------------------------------------------------------------------------------------------------------------------------------------------------------------------------------------------------------------------------------------------------------------------------------------------------------------------------------------------------------------------------------------------------------------------------------------------------------------------------------------------------------------------------------------------------------------------------------------------------------------------------------------------------------------------------------------------------------------------------------------------------------------------------------------------------------------------------------------------------------------------------------------------------------------------------------------------------------------------------------------------------------------------------------------------------------------------------------------------------------------------------------------------------------------------------------------------------------------------------------------------------------------------------------------------------------------------------------|-----------------------------------------------------------------------------------------------------------------------------------------------------------------------------------------------------------------------------------------------------------------------------------------------------------------------------------------------------------------------------------------------------------------------------------------------------------------------------------------------------------------------------------------------------------------------------------------------------------------------------------------------------------------------------------------------------------------------------------------------------------------------------------------------------------------------------------------------------------------------------------------------------------------------------------------------------------------------------------------------------------------------------------------------------------------------------------------------------------------------------------------------------------------------------------------------------------------------------------------------------------------------------|-------------------------------------------------------------------------------------------------------------------------------------------------------------------------------------------------------------------------------------------------------------------------------------------------------------------------------------------------------------------------------------------------------------------------------------------------------------------------------------------------------------------------------------------------------------------------------------------------------------------------------------------------------------------------------------------------------------------------------------------------------------------------------------------------------------------------------------------------------------------------------------------------------------------------------------------------------------------------------------------------------------------------------------------------------------------------------------------------------------------------------------------------------------------------------------------------------------------------------------------------------------------------------------------------------------------------------------------------------------------------------------------------------------------------------------------------------------------------------------------------------------------------------------------------------------------------------------------------------------------------------------------------------------|---------------------------------------------------------------------------------------------------------------------------------------------------------------------------------------------------------------------------------------------------------------------------------------------------------------------------------------------------------------------------------------------------------------------------------------------------------------------------------------------------------------------------------------------------------------------------------------------------------------------------------------------------------------------------------------------------------------------------------------------------------------------------------------------------------------------------------------------------------------------------------------------------------------------------------------------------------------------------------------------------------------------------------------------------------------------------------------------------------------------------------------------------------------------------------------------------------------------------|

| Reference | Year | Sample size | % Female | Age (years +/- SD) | BMI (KG/M2 +/- SD) | Normal (%) | Steatosis (%) |
|-----------|------|-------------|----------|--------------------|--------------------|------------|---------------|
| (1)       | 1998 | 528         | 81       | 36 ± 11            | 43 ± 7             | 21%        | 74%           |
| (2)       | 1999 | 551         | 80       | 36 ± 9             | 47 ± 9             | 14%        | 86%           |
| (3)       | 2004 | 105         | 78       | 41 ± 11            | 47 ± 7             | 4%         | 71%           |
| (4)       | 2002 | 35          | 74       | 33 ± 10            | 44 ± 8             | 9%         | -             |
| (5)       | 2003 | 48          | 69       | 42 ± 10            | 59.9 ± 12          | 15%        | 85%           |
| (6)       | 2003 | 48          | 84       | -                  | 51 ± 2             | 12%        | 58%           |
| (7)       | 2004 | 195         | 88       | 41 ± 9             | 48 ± 7             | 33%        | 67%           |
| (8)       | 2005 | 212         | 80       | 42 ± 10            | 48 ± 9             | 7%         | 93%           |
| (9)       | 2005 | 125         | 62       | 40 ± 11            | 42 ± 6             | 37%        | 63%           |
| (10)      | 2005 | 112         | 74       | 36 ± 10            | 49 ± 8             | 1%         | 99%           |
| (11)      | 2005 | 51          | -        | -                  | 53 ± 1             | 2%         | 98%           |
| (12)      | 2007 | 135         | 80       | 46 ± 10            | 50 ± 8             | 14%        | 59%           |
| (13)      | 2007 | 137         | -        | -                  | -                  | 4%         | 92%           |
| (14)      | 2009 | 142         | 79       | 49 ± 10            | 48 ± 7             | 30%        | 70%           |
| (15)      | 2009 | 238         | 75       | 42 ± 9             | 56 ± 10            | 11%        | 89%           |
| (16)      | 2010 | 129         | 81       | -                  | -                  | -          | 26%           |

|      |      |     |    |         |         |     |     |
|------|------|-----|----|---------|---------|-----|-----|
| (17) | 2010 | 679 | 80 | 43      | 48 ± 8  | 16% | 77% |
| (18) | 2011 | 437 | 78 | 48 ± 11 | 49 ± 9  | 22% | 78% |
| (19) | 2012 | 21  | 62 | 30 ± 8  | -       | 10% | 90% |
| (20) | 2012 | 26  | -  | -       | 49 ± 5  | -   | -   |
| (21) | 2013 | 24  | 88 | 38 ± 7  | 51 ± 11 | -   | 33% |
| (22) | 2014 | 296 | 61 | 47 ± 9  | 44 ± 9  | -   | 42% |

1. Luyckx FH, Desai C, Thiry A, Dewe W, Scheen AJ, Gielen JE, Lefebvre PJ. Liver abnormalities in severely obese subjects: effect of drastic weight loss after gastroplasty. *Int J Obes Relat Metab Disord* 1998;22:222-226.
2. Marceau P, Biron S, Hould FS, Marceau S, Simard S, Thung SN, Kral JG. Liver pathology and the metabolic syndrome X in severe obesity. *J Clin Endocrinol Metab* 1999;84:1513-1517.
3. Dixon JB, Bhathal PS, Hughes NR, O'Brien PE. Nonalcoholic fatty liver disease: Improvement in liver histological analysis with weight loss. *Hepatology* 2004;39:1647-1654.
4. Sepulveda-Flores RN, Vera-Cabrera L, Flores-Gutierrez JP, Maldonado-Garza H, Salinas-Garza R, Zorrilla-Blanco P, Bosques-Padilla FJ. Obesity-related non-alcoholic steatohepatitis and TGF-beta1 serum levels in relation to morbid obesity. *Ann Hepatol* 2002;1:36-39.
5. Beymer C, Kowdley KV, Larson A, Edmonson P, Dellinger EP, Flum DR. Prevalence and predictors of asymptomatic liver disease in patients undergoing gastric bypass surgery. *Arch Surg* 2003;138:1240-1244.
6. Spaulding L, Trainer T, Janiec D. Prevalence of non-alcoholic steatohepatitis in morbidly obese subjects undergoing gastric bypass. *Obes Surg* 2003;13:347-349.
7. Abrams GA, Kunde SS, Lazenby AJ, Clements RH. Portal fibrosis and hepatic steatosis in morbidly obese subjects: A spectrum of nonalcoholic fatty liver disease. *Hepatology* 2004;40:475-483.
8. Ong JP, Younossi ZM. Approach to the diagnosis and treatment of nonalcoholic fatty liver disease. *Clin Liver Dis* 2005;9:617-634, vi.
9. Boza C, Riquelme A, Ibanez L, Duarte I, Norero E, Viviani P, Soza A, et al. Predictors of nonalcoholic steatohepatitis (NASH) in obese patients undergoing gastric bypass. *Obes Surg* 2005;15:1148-1153.
10. Lima ML, Mourao SC, Diniz MT, Leite VH. Hepatic histopathology of patients with morbid obesity submitted to gastric bypass. *Obes Surg* 2005;15:661-669.
11. Stratopoulos C, Papakonstantinou A, Terzis I, Spiliadi C, Dimitriades G, Komesidou V, Kitsanta P, et al. Changes in liver histology accompanying massive weight loss after gastroplasty for morbid obesity. *Obes Surg* 2005;15:1154-1160.
12. Kroh M, Liu R, Chand B. Laparoscopic bariatric surgery: what else are we uncovering? Liver pathology and preoperative indicators of advanced liver disease in morbidly obese patients. *Surg Endosc* 2007;21:1957-1960.
13. Jouet P, Sabate JM, Maillard D, Msika S, Mechler C, Ledoux S, Harnois F, et al. Relationship between obstructive sleep apnea and liver abnormalities in morbidly obese patients: a prospective study. *Obes Surg* 2007;17:478-485.
14. Kashyap SR, Diab DL, Baker AR, Yerian L, Bajaj H, Gray-McGuire C, Schauer PR, et al. Triglyceride levels and not adipokine concentrations are closely related to severity of nonalcoholic fatty liver disease in an obesity surgery cohort. *Obesity (Silver Spring)* 2009;17:1696-1701.
15. Kallwitz ER, Guzman G, TenCate V, Vitello J, Layden-Almer J, Berkes J, Patel R, et al. The histologic spectrum of liver disease in African-American, non-Hispanic white, and Hispanic obesity surgery patients. *Am J Gastroenterol* 2009;104:64-69.

16. Guajardo-Salinas GE, Hilmy A. Prevalence of nonalcoholic fatty liver disease (NAFLD) and utility of FIBROspect II to detect liver fibrosis in morbidly obese Hispano-American patients undergoing gastric bypass. *Obes Surg* 2010;20:1647-1653.
17. Bedossa P, Poitou C, Veyrie N, Bouillot JL, Basdevant A, Paradis V, Tordjman J, et al. Histopathological algorithm and scoring system for evaluation of liver lesions in morbidly obese patients. *Hepatology* 2012;56:1751-1759.
18. Ribeiroiro T, Swain J, Sarr M, Kendrick M, Que F, Sanderson S, Krishnan A, et al. NAFLD and insulin resistance do not increase the risk of postoperative complications among patients undergoing bariatric surgery--a prospective analysis. *Obes Surg* 2011;21:310-315.
19. Tai CM, Huang CK, Hwang JC, Chiang H, Chang CY, Lee CT, Yu ML, et al. Improvement of nonalcoholic fatty liver disease after bariatric surgery in morbidly obese Chinese patients. *Obes Surg* 2012;22:1016-1021.
20. Vargas V, Allende H, Lecube A, Salcedo MT, Baena-Fustegueras JA, Fort JM, Rivero J, et al. Surgically induced weight loss by gastric bypass improves non alcoholic fatty liver disease in morbid obese patients. *World J Hepatol* 2012;4:382-388.
21. Holterman AX, Guzman G, Fantuzzi G, Wang H, Aigner K, Browne A, Holterman M. Nonalcoholic fatty liver disease in severely obese adolescent and adult patients. *Obesity (Silver Spring)* 2013;21:591-597.
22. Hyysalo J, Mannisto VT, Zhou Y, Arola J, Karja V, Leivonen M, Juuti A, et al. A population-based study on the prevalence of NASH using scores validated against liver histology. *J Hepatol* 2013.
